# Supplementary material
Source: Elsevier journal article supplement (http://library.osu.edu/projects/msa/suppmat/v261.i2.pp82-86/mmc1.pdf)
Supplement: mmc1 [file mmc1.pdf]

Table S1: Observed Transition Frequencies in MHz for Difluoriodomethane, CHF<sub>2</sub>I.

| $J'_{K-1,K+1} F' - J''_{K-1,K+1} F''$       | Observed   | O-C <sup>a</sup> | Unc. <sup>b</sup> |
|---------------------------------------------|------------|------------------|-------------------|
| $1_{0,1} \frac{7}{2} - 0_{0,0} \frac{5}{2}$ | 3977.3212  | 0.0004           | 0.002             |
| $1_{0,1} \frac{3}{2} - 0_{0,0} \frac{5}{2}$ | 4144.4263  | -0.0015          | 0.002             |
| $1_{1,0} \frac{3}{2} - 0_{0,0} \frac{5}{2}$ | 12105.5148 | 0.0047           | 0.006             |
| $1_{1,0} \frac{7}{2} - 0_{0,0} \frac{5}{2}$ | 12185.2596 | -0.0002          | 0.006             |
| $1_{1,0} \frac{5}{2} - 0_{0,0} \frac{5}{2}$ | 12369.5584 | -0.0032          | 0.006             |
| $1_{1,1} \frac{7}{2} - 1_{0,1} \frac{7}{2}$ | 7920.8256  | 0.0039           | 0.006             |
| $1_{1,1} \frac{5}{2} - 1_{0,1} \frac{3}{2}$ | 7952.5825  | 0.0008           | 0.006             |
| $1_{1,1} \frac{5}{2} - 1_{0,1} \frac{7}{2}$ | 8119.6872  | -0.0016          | 0.006             |
| $1_{1,1} \frac{7}{2} - 1_{0,1} \frac{5}{2}$ | 8301.7509  | 0.0025           | 0.006             |
| $1_{1,1} \frac{3}{2} - 1_{0,1} \frac{5}{2}$ | 8305.7898  | 0.0000           | 0.006             |
| $1_{1,1} \frac{5}{2} - 1_{0,1} \frac{5}{2}$ | 8500.6145  | -0.0010          | 0.006             |
| $1_{1,1} \frac{3}{2} - 1_{0,1} \frac{3}{2}$ | 7757.7600  | 0.0039           | 0.006             |
| $2_{0,2} \frac{3}{2} - 1_{0,1} \frac{5}{2}$ | 8070.9660  | -0.0037          | 0.006             |
| $2_{0,2} \frac{5}{2} - 1_{0,1} \frac{5}{2}$ | 7921.8622  | -0.0013          | 0.006             |
| $2_{0,2} \frac{1}{2} - 1_{0,1} \frac{3}{2}$ | 7864.3252  | 0.0009           | 0.006             |
| $2_{0,2} \frac{9}{2} - 1_{0,1} \frac{7}{2}$ | 7795.1712  | -0.0020          | 0.006             |
| $2_{0,2} \frac{7}{2} - 1_{0,1} \frac{5}{2}$ | 7811.5378  | -0.0011          | 0.006             |
| $2_{1,1} \frac{5}{2} - 1_{1,0} \frac{3}{2}$ | 8125.2225  | -0.0046          | 0.006             |
| $2_{1,1} \frac{9}{2} - 1_{1,0} \frac{7}{2}$ | 8177.2679  | 0.0005           | 0.006             |

*continued*

Supplementary Data Table 1. (continued)

| $J'_{K-1,K+1}F' - J''_{K-1,K+1}F''$       | Observed   | O-C <sup>a</sup> | Unc. <sup>b</sup> |
|-------------------------------------------|------------|------------------|-------------------|
| $2_{1,1\frac{3}{2}} - 1_{1,0\frac{3}{2}}$ | 8270.5218  | -0.0023          | 0.006             |
| $2_{1,1\frac{7}{2}} - 1_{1,0\frac{5}{2}}$ | 7816.4386  | 0.0131           | 0.006             |
| $2_{1,1\frac{7}{2}} - 1_{1,0\frac{7}{2}}$ | 8000.7186  | -0.0086          | 0.006             |
| $2_{1,1\frac{3}{2}} - 1_{1,0\frac{5}{2}}$ | 8006.4786  | 0.0061           | 0.006             |
| $2_{1,1\frac{1}{2}} - 1_{1,0\frac{3}{2}}$ | 8385.6723  | -0.0009          | 0.006             |
| $2_{1,1\frac{5}{2}} - 1_{1,0\frac{7}{2}}$ | 8045.4733  | -0.0039          | 0.006             |
| $2_{1,1\frac{5}{2}} - 1_{0,1\frac{3}{2}}$ | 16086.3110 | 0.0017           | 0.002             |
| $2_{1,1\frac{7}{2}} - 1_{0,1\frac{7}{2}}$ | 16208.6680 | 0.0015           | 0.002             |
| $2_{1,1\frac{3}{2}} - 1_{0,1\frac{3}{2}}$ | 16231.6108 | 0.0044           | 0.002             |
| $2_{1,1\frac{5}{2}} - 1_{0,1\frac{7}{2}}$ | 16253.4175 | 0.0010           | 0.002             |
| $2_{1,1\frac{1}{2}} - 1_{0,1\frac{3}{2}}$ | 16346.7598 | 0.0044           | 0.002             |
| $2_{1,1\frac{9}{2}} - 1_{0,1\frac{7}{2}}$ | 16385.2129 | 0.0063           | 0.002             |
| $2_{1,1\frac{7}{2}} - 1_{0,1\frac{5}{2}}$ | 16589.5958 | 0.0026           | 0.002             |
| $2_{1,1\frac{5}{2}} - 1_{0,1\frac{5}{2}}$ | 16634.3438 | 0.0006           | 0.002             |
| $2_{1,1\frac{3}{2}} - 1_{0,1\frac{5}{2}}$ | 16779.6406 | 0.0004           | 0.002             |
| $2_{1,2\frac{9}{2}} - 2_{0,2\frac{7}{2}}$ | 8052.1515  | 0.0038           | 0.006             |
| $2_{1,2\frac{5}{2}} - 2_{0,2\frac{7}{2}}$ | 7937.3386  | 0.0025           | 0.006             |
| $2_{1,2\frac{7}{2}} - 2_{0,2\frac{5}{2}}$ | 7790.3346  | -0.0004          | 0.006             |
| $2_{1,2\frac{3}{2}} - 2_{0,2\frac{3}{2}}$ | 7809.6200  | 0.0011           | 0.006             |
| $2_{1,2\frac{3}{2}} - 2_{0,2\frac{5}{2}}$ | 7958.7244  | -0.0007          | 0.006             |
| $2_{1,2\frac{5}{2}} - 2_{0,2\frac{5}{2}}$ | 7827.0137  | 0.0023           | 0.006             |
| $2_{1,2\frac{7}{2}} - 2_{0,2\frac{7}{2}}$ | 7900.6612  | 0.0015           | 0.006             |

*continued*

Supplementary Data Table 1. (continued)

| $J'_{K-1,K+1}F' - J''_{K-1,K+1}F''$        | Observed   | O-C <sup>a</sup> | Unc. <sup>b</sup> |
|--------------------------------------------|------------|------------------|-------------------|
| $2_{1,2\frac{1}{2}} - 2_{0,2\frac{3}{2}}$  | 7907.0046  | 0.0010           | 0.006             |
| $2_{2,0\frac{1}{2}} - 3_{1,2\frac{3}{2}}$  | 11548.9106 | 0.0091           | 0.006             |
| $2_{2,0\frac{3}{2}} - 3_{1,2\frac{3}{2}}$  | 11776.7885 | 0.0031           | 0.006             |
| $2_{2,0\frac{9}{2}} - 3_{1,2\frac{9}{2}}$  | 12077.0006 | 0.0009           | 0.006             |
| $2_{2,0\frac{5}{2}} - 3_{1,2\frac{5}{2}}$  | 12202.8186 | 0.0040           | 0.006             |
| $2_{2,0\frac{5}{2}} - 3_{1,2\frac{7}{2}}$  | 12336.0879 | -0.0013          | 0.006             |
| $2_{2,0\frac{7}{2}} - 3_{1,2\frac{7}{2}}$  | 12432.2649 | -0.0086          | 0.006             |
| $2_{2,0\frac{7}{2}} - 3_{1,2\frac{9}{2}}$  | 12433.8348 | 0.0006           | 0.006             |
| $2_{2,1\frac{1}{2}} - 3_{1,3\frac{3}{2}}$  | 13337.2535 | 0.0016           | 0.006             |
| $2_{2,1\frac{3}{2}} - 3_{1,3\frac{3}{2}}$  | 13565.5766 | 0.0000           | 0.006             |
| $2_{2,1\frac{9}{2}} - 3_{1,3\frac{11}{2}}$ | 13607.1946 | 0.0002           | 0.006             |
| $2_{2,1\frac{3}{2}} - 3_{1,3\frac{5}{2}}$  | 13718.0197 | 0.0006           | 0.006             |
| $2_{2,1\frac{9}{2}} - 3_{1,3\frac{9}{2}}$  | 13841.2649 | 0.0072           | 0.006             |
| $2_{2,1\frac{5}{2}} - 3_{1,3\frac{5}{2}}$  | 13978.9103 | -0.0024          | 0.006             |
| $2_{2,1\frac{5}{2}} - 3_{1,3\frac{7}{2}}$  | 14102.4265 | -0.0041          | 0.006             |
| $2_{2,1\frac{7}{2}} - 3_{1,3\frac{9}{2}}$  | 14198.2994 | 0.0013           | 0.006             |
| $3_{0,3\frac{9}{2}} - 2_{0,2\frac{9}{2}}$  | 11303.8898 | 0.0000           | 0.006             |
| $3_{0,3\frac{7}{2}} - 2_{0,2\frac{9}{2}}$  | 11307.8997 | -0.0158          | 0.006             |
| $3_{0,3\frac{3}{2}} - 2_{0,2\frac{1}{2}}$  | 11451.5085 | -0.0030          | 0.006             |
| $3_{0,3\frac{7}{2}} - 2_{0,2\frac{5}{2}}$  | 11562.1519 | 0.0000           | 0.006             |
| $3_{0,3\frac{5}{2}} - 2_{0,2\frac{3}{2}}$  | 11583.2894 | 0.0032           | 0.006             |

*continued*

Supplementary Data Table 1. (continued)

| $J'_{K-1,K+1}F' - J''_{K-1,K+1}F''$        | Observed   | O-C <sup>a</sup> | Unc. <sup>b</sup> |
|--------------------------------------------|------------|------------------|-------------------|
| $3_{0,3}\frac{1}{2} - 2_{0,2}\frac{1}{2}$  | 11611.9601 | -0.0012          | 0.006             |
| $3_{0,3}\frac{11}{2} - 2_{0,2}\frac{9}{2}$ | 11633.6408 | 0.0021           | 0.006             |
| $3_{0,3}\frac{9}{2} - 2_{0,2}\frac{7}{2}$  | 11668.4554 | 0.0046           | 0.006             |
| $3_{0,3}\frac{7}{2} - 2_{0,2}\frac{7}{2}$  | 11672.4789 | 0.0023           | 0.006             |
| $3_{0,3}\frac{5}{2} - 2_{0,2}\frac{5}{2}$  | 11732.3936 | 0.0011           | 0.006             |
| $3_{0,3}\frac{3}{2} - 2_{0,2}\frac{3}{2}$  | 11792.8950 | -0.0049          | 0.006             |
| $3_{0,3}\frac{5}{2} - 2_{0,2}\frac{7}{2}$  | 11842.7242 | 0.0071           | 0.006             |
| $3_{0,3}\frac{1}{2} - 2_{0,2}\frac{3}{2}$  | 11953.3694 | 0.0197           | 0.006             |
| $3_{0,3}\frac{5}{2} - 1_{1,1}\frac{3}{2}$  | 11348.4635 | -0.0025          | 0.006             |
| $3_{0,3}\frac{9}{2} - 1_{1,1}\frac{7}{2}$  | 11178.2365 | -0.0048          | 0.006             |
| $3_{0,3}\frac{3}{2} - 1_{1,1}\frac{3}{2}$  | 11558.0756 | -0.0042          | 0.006             |
| $3_{0,3}\frac{9}{2} - 2_{1,1}\frac{9}{2}$  | 2713.8557  | -0.0006          | 0.002             |
| $3_{0,3}\frac{7}{2} - 2_{1,1}\frac{5}{2}$  | 2849.6745  | 0.0022           | 0.002             |
| $3_{0,3}\frac{5}{2} - 2_{1,1}\frac{3}{2}$  | 2874.6149  | -0.0008          | 0.002             |
| $3_{0,3}\frac{3}{2} - 2_{1,1}\frac{1}{2}$  | 2969.0773  | -0.0031          | 0.002             |
| $3_{0,3}\frac{5}{2} - 2_{1,1}\frac{5}{2}$  | 3019.9131  | 0.0002           | 0.002             |
| $3_{0,3}\frac{3}{2} - 2_{1,1}\frac{3}{2}$  | 3084.2310  | 0.0014           | 0.002             |
| $3_{1,2}\frac{7}{2} - 2_{1,1}\frac{9}{2}$  | 11881.4914 | 0.0028           | 0.006             |
| $3_{1,2}\frac{5}{2} - 2_{1,1}\frac{3}{2}$  | 12001.2556 | -0.0007          | 0.006             |
| $3_{1,2}\frac{7}{2} - 2_{1,1}\frac{5}{2}$  | 12013.2814 | 0.0027           | 0.006             |
| $3_{1,2}\frac{9}{2} - 2_{1,1}\frac{7}{2}$  | 12056.4604 | -0.0076          | 0.006             |

*continued*

Supplementary Data Table 1. (continued)

| $J'_{K-1,K+1}F' - J''_{K-1,K+1}F''$         | Observed   | O-C <sup>a</sup> | Unc. <sup>b</sup> |
|---------------------------------------------|------------|------------------|-------------------|
| $3_{1,2}\frac{7}{2} - 2_{1,1}\frac{7}{2}$   | 12058.0270 | -0.0016          | 0.006             |
| $3_{1,2}\frac{11}{2} - 2_{1,1}\frac{9}{2}$  | 12136.7093 | -0.0002          | 0.006             |
| $3_{1,2}\frac{5}{2} - 2_{1,1}\frac{5}{2}$   | 12146.5540 | 0.0006           | 0.006             |
| $3_{1,2}\frac{3}{2} - 2_{1,1}\frac{3}{2}$   | 12166.5464 | 0.0000           | 0.006             |
| $3_{1,2}\frac{1}{2} - 2_{1,1}\frac{1}{2}$   | 12178.3665 | -0.0027          | 0.006             |
| $3_{1,2}\frac{5}{2} - 2_{1,1}\frac{7}{2}$   | 12191.3132 | 0.0098           | 0.006             |
| $3_{1,2}\frac{3}{2} - 2_{1,1}\frac{5}{2}$   | 12311.8389 | -0.0045          | 0.006             |
| $3_{1,2}\frac{11}{2} - 3_{1,3}\frac{11}{2}$ | 1795.6594  | -0.0002          | 0.002             |
| $3_{1,3}\frac{3}{2} - 2_{1,2}\frac{3}{2}$   | 11268.5771 | -0.0028          | 0.006             |
| $3_{1,3}\frac{5}{2} - 2_{1,2}\frac{7}{2}$   | 11284.5303 | 0.0026           | 0.006             |
| $3_{1,3}\frac{1}{2} - 2_{1,2}\frac{1}{2}$   | 11287.1929 | -0.0005          | 0.006             |
| $3_{1,3}\frac{9}{2} - 2_{1,2}\frac{9}{2}$   | 11009.4359 | 0.0025           | 0.006             |
| $3_{1,3}\frac{5}{2} - 2_{1,2}\frac{3}{2}$   | 11116.1354 | -0.0021          | 0.006             |
| $3_{1,3}\frac{1}{2} - 2_{1,2}\frac{3}{2}$   | 11384.5760 | -0.0021          | 0.006             |
| $3_{1,3}\frac{3}{2} - 2_{1,2}\frac{5}{2}$   | 11400.2963 | 0.0026           | 0.006             |
| $3_{1,3}\frac{7}{2} - 2_{1,2}\frac{5}{2}$   | 11124.3328 | -0.0005          | 0.006             |
| $3_{1,3}\frac{9}{2} - 2_{1,2}\frac{7}{2}$   | 11160.9180 | -0.0033          | 0.006             |
| $3_{1,3}\frac{3}{2} - 2_{1,2}\frac{1}{2}$   | 11171.1930 | -0.0022          | 0.006             |
| $3_{1,3}\frac{11}{2} - 2_{1,2}\frac{9}{2}$  | 11243.4981 | 0.0013           | 0.006             |
| $3_{1,3}\frac{5}{2} - 2_{1,2}\frac{5}{2}$   | 11247.8492 | -0.0021          | 0.006             |
| $3_{2,1}\frac{9}{2} - 4_{1,3}\frac{11}{2}$  | 7789.1431  | -0.0018          | 0.006             |

*continued*

Supplementary Data Table 1. (continued)

| $J'_{K-1,K+1}F' - J''_{K-1,K+1}F''$         | Observed   | O-C <sup>a</sup> | Unc. <sup>b</sup> |
|---------------------------------------------|------------|------------------|-------------------|
| $3_{2,1\frac{7}{2}} - 4_{1,3\frac{9}{2}}$   | 7812.9941  | -0.0086          | 0.006             |
| $3_{2,1\frac{9}{2}} - 2_{2,0\frac{9}{2}}$   | 11818.1525 | -0.0168          | 0.006             |
| $3_{2,1\frac{7}{2}} - 2_{2,0\frac{7}{2}}$   | 11453.6496 | -0.0084          | 0.006             |
| $3_{2,1\frac{9}{2}} - 2_{2,0\frac{7}{2}}$   | 11461.3309 | -0.0039          | 0.006             |
| $3_{2,1\frac{11}{2}} - 2_{2,0\frac{9}{2}}$  | 11809.1287 | 0.0007           | 0.006             |
| $3_{2,1\frac{7}{2}} - 2_{2,0\frac{5}{2}}$   | 11549.8414 | -0.0009          | 0.006             |
| $3_{2,1\frac{5}{2}} - 2_{2,0\frac{5}{2}}$   | 11555.0746 | -0.0004          | 0.006             |
| $3_{2,1\frac{5}{2}} - 2_{2,0\frac{3}{2}}$   | 11815.8148 | 0.0006           | 0.006             |
| $3_{2,2\frac{3}{2}} - 2_{2,1\frac{3}{2}}$   | 11787.4330 | 0.0040           | 0.006             |
| $3_{2,2\frac{9}{2}} - 2_{2,1\frac{7}{2}}$   | 11430.1747 | -0.0166          | 0.006             |
| $3_{2,2\frac{7}{2}} - 2_{2,1\frac{5}{2}}$   | 11518.3456 | -0.0024          | 0.006             |
| $3_{2,2\frac{11}{2}} - 2_{2,1\frac{9}{2}}$  | 11777.0596 | 0.0005           | 0.006             |
| $3_{2,2\frac{5}{2}} - 2_{2,1\frac{5}{2}}$   | 11523.1112 | 0.0021           | 0.006             |
| $3_{2,2\frac{5}{2}} - 2_{2,1\frac{3}{2}}$   | 11783.9982 | -0.0045          | 0.006             |
| $3_{2,2\frac{9}{2}} - 2_{2,1\frac{9}{2}}$   | 11787.2283 | -0.0034          | 0.006             |
| $3_{2,2\frac{5}{2}} - 4_{1,4\frac{7}{2}}$   | 10635.3787 | 0.0001           | 0.006             |
| $3_{2,2\frac{11}{2}} - 4_{1,4\frac{11}{2}}$ | 10703.6526 | 0.0009           | 0.006             |
| $3_{2,2\frac{7}{2}} - 4_{1,4\frac{9}{2}}$   | 10735.9400 | -0.0022          | 0.006             |
| $3_{2,2\frac{9}{2}} - 4_{1,4\frac{9}{2}}$   | 10743.5611 | -0.0034          | 0.006             |
| $3_{2,2\frac{1}{2}} - 4_{1,4\frac{3}{2}}$   | 10316.5132 | 0.0065           | 0.006             |
| $3_{2,2\frac{3}{2}} - 4_{1,4\frac{3}{2}}$   | 10318.7776 | 0.0011           | 0.006             |

*continued*

Supplementary Data Table 1. (continued)

| $J'_{K-1,K+1}F' - J''_{K-1,K+1}F''$           | Observed   | O-C <sup>a</sup> | Unc. <sup>b</sup> |
|-----------------------------------------------|------------|------------------|-------------------|
| $3_{2,2} \frac{11}{2} - 4_{1,4} \frac{13}{2}$ | 10442.6461 | 0.0039           | 0.006             |
| $3_{2,2} \frac{9}{2} - 4_{1,4} \frac{11}{2}$  | 10713.8194 | -0.0049          | 0.006             |
| $3_{2,2} \frac{5}{2} - 4_{1,4} \frac{5}{2}$   | 10473.7821 | -0.0048          | 0.006             |
| $3_{2,2} \frac{3}{2} - 4_{1,4} \frac{5}{2}$   | 10477.2156 | 0.0024           | 0.006             |
| $3_{2,2} \frac{7}{2} - 4_{1,4} \frac{7}{2}$   | 10630.6150 | -0.0025          | 0.006             |
| $4_{0,4} \frac{11}{2} - 3_{0,3} \frac{11}{2}$ | 15139.0550 | -0.0082          | 0.006             |
| $4_{0,4} \frac{5}{2} - 3_{0,3} \frac{3}{2}$   | 15373.2966 | -0.0021          | 0.006             |
| $4_{0,4} \frac{7}{2} - 3_{0,3} \frac{5}{2}$   | 15386.5765 | 0.0029           | 0.006             |
| $4_{0,4} \frac{3}{2} - 3_{0,3} \frac{1}{2}$   | 15404.7482 | -0.0037          | 0.006             |
| $4_{0,4} \frac{9}{2} - 3_{0,3} \frac{7}{2}$   | 15428.9604 | -0.0008          | 0.006             |
| $4_{0,4} \frac{9}{2} - 3_{0,3} \frac{9}{2}$   | 15432.9834 | -0.0036          | 0.006             |
| $4_{0,4} \frac{13}{2} - 3_{0,3} \frac{11}{2}$ | 15458.1005 | 0.0007           | 0.006             |
| $4_{0,4} \frac{11}{2} - 3_{0,3} \frac{9}{2}$  | 15468.8112 | -0.0009          | 0.006             |
| $4_{0,4} \frac{7}{2} - 3_{0,3} \frac{7}{2}$   | 15556.8143 | 0.0001           | 0.006             |
| $4_{0,4} \frac{3}{2} - 3_{0,3} \frac{3}{2}$   | 15565.2100 | 0.0082           | 0.006             |
| $4_{0,4} \frac{5}{2} - 3_{0,3} \frac{5}{2}$   | 15582.9113 | -0.0012          | 0.006             |
| $4_{1,3} \frac{11}{2} - 3_{1,2} \frac{11}{2}$ | 15849.2209 | -0.0215          | 0.006             |
| $4_{1,3} \frac{11}{2} - 3_{1,2} \frac{9}{2}$  | 16106.0194 | -0.0046          | 0.006             |
| $4_{1,3} \frac{13}{2} - 3_{1,2} \frac{11}{2}$ | 16131.8718 | 0.0033           | 0.006             |
| $4_{1,4} \frac{7}{2} - 3_{1,3} \frac{5}{2}$   | 14866.6432 | 0.0000           | 0.006             |
| $4_{1,4} \frac{5}{2} - 3_{1,3} \frac{3}{2}$   | 14875.7946 | 0.0021           | 0.006             |

*continued*

Supplementary Data Table 1. (continued)

| $J'_{K-1,K+1}F' - J''_{K-1,K+1}F''$         | Observed   | O-C <sup>a</sup> | Unc. <sup>b</sup> |
|---------------------------------------------|------------|------------------|-------------------|
| $4_{1,4}\frac{9}{2} - 3_{1,3}\frac{7}{2}$   | 14884.8379 | 0.0013           | 0.006             |
| $4_{1,4}\frac{11}{2} - 3_{1,3}\frac{9}{2}$  | 14914.6655 | 0.0004           | 0.006             |
| $4_{1,4}\frac{3}{2} - 3_{1,3}\frac{1}{2}$   | 14918.2326 | 0.0016           | 0.006             |
| $4_{1,4}\frac{13}{2} - 3_{1,3}\frac{11}{2}$ | 14941.6100 | -0.0011          | 0.006             |
| $4_{1,4}\frac{7}{2} - 3_{1,3}\frac{7}{2}$   | 14990.1561 | -0.0050          | 0.006             |
| $4_{1,4}\frac{5}{2} - 3_{1,3}\frac{5}{2}$   | 15028.2336 | -0.0012          | 0.006             |
| $4_{1,4}\frac{3}{2} - 3_{1,3}\frac{3}{2}$   | 15034.2268 | -0.0023          | 0.006             |
| $4_{2,2}\frac{5}{2} - 3_{2,1}\frac{3}{2}$   | 15649.1675 | -0.0159          | 0.006             |
| $4_{2,2}\frac{13}{2} - 3_{2,1}\frac{11}{2}$ | 15667.9962 | 0.0021           | 0.006             |
| $4_{2,2}\frac{7}{2} - 3_{2,1}\frac{5}{2}$   | 15570.6659 | -0.0022          | 0.006             |
| $4_{2,2}\frac{9}{2} - 3_{2,1}\frac{7}{2}$   | 15522.5787 | -0.0008          | 0.006             |
| $4_{2,2}\frac{11}{2} - 3_{2,1}\frac{9}{2}$  | 15533.3401 | 0.0023           | 0.006             |
| $4_{2,3}\frac{9}{2} - 3_{2,2}\frac{7}{2}$   | 15442.8202 | -0.0033          | 0.006             |
| $4_{2,3}\frac{11}{2} - 3_{2,2}\frac{9}{2}$  | 15453.1262 | -0.0001          | 0.006             |
| $4_{2,3}\frac{5}{2} - 3_{2,2}\frac{3}{2}$   | 15569.3838 | 0.0164           | 0.006             |
| $4_{2,3}\frac{13}{2} - 3_{2,2}\frac{11}{2}$ | 15587.5208 | 0.0030           | 0.006             |
| $4_{2,3}\frac{7}{2} - 3_{2,2}\frac{5}{2}$   | 15491.3084 | -0.0101          | 0.006             |
| $4_{3,1}\frac{13}{2} - 3_{3,0}\frac{11}{2}$ | 15673.8753 | 0.0055           | 0.006             |
| $4_{3,1}\frac{9}{2} - 3_{3,0}\frac{7}{2}$   | 15383.5372 | -0.0070          | 0.006             |
| $4_{3,2}\frac{9}{2} - 3_{3,1}\frac{7}{2}$   | 15382.6613 | 0.0107           | 0.006             |

*continued*

Supplementary Data Table 1. (continued)

| $J'_{K-1,K+1}F' - J''_{K-1,K+1}F''$           | Observed   | O-C <sup>a</sup> | Unc. <sup>b</sup> |
|-----------------------------------------------|------------|------------------|-------------------|
| $4_{3,2} \frac{11}{2} - 3_{3,1} \frac{9}{2}$  | 15372.3796 | -0.0038          | 0.006             |
| $5_{0,5} \frac{7}{2} - 4_{1,3} \frac{7}{2}$   | 9610.4150  | 0.0020           | 0.006             |
| $5_{0,5} \frac{5}{2} - 4_{1,3} \frac{5}{2}$   | 9645.1822  | 0.0002           | 0.006             |
| $5_{0,5} \frac{13}{2} - 4_{1,3} \frac{13}{2}$ | 9177.5547  | -0.0031          | 0.006             |
| $5_{0,5} \frac{11}{2} - 4_{1,3} \frac{11}{2}$ | 9402.4837  | 0.0023           | 0.006             |
| $5_{0,5} \frac{9}{2} - 4_{1,3} \frac{7}{2}$   | 9423.9464  | -0.0025          | 0.006             |
| $5_{0,5} \frac{11}{2} - 4_{1,3} \frac{9}{2}$  | 9434.0171  | 0.0011           | 0.006             |
| $5_{0,5} \frac{7}{2} - 4_{1,3} \frac{5}{2}$   | 9436.5541  | -0.0004          | 0.006             |
| $5_{0,5} \frac{13}{2} - 4_{1,3} \frac{11}{2}$ | 9460.1845  | 0.0006           | 0.006             |
| $5_{0,5} \frac{5}{2} - 4_{1,3} \frac{3}{2}$   | 9474.1630  | -0.0026          | 0.006             |
| $5_{0,5} \frac{15}{2} - 4_{1,3} \frac{13}{2}$ | 9488.2152  | -0.0007          | 0.006             |
| $5_{0,5} \frac{9}{2} - 4_{1,3} \frac{9}{2}$   | 9536.6340  | 0.0011           | 0.006             |
| $5_{1,4} \frac{15}{2} - 5_{1,5} \frac{15}{2}$ | 4471.5247  | -0.0024          | 0.002             |
| $5_{2,4} \frac{15}{2} - 6_{1,6} \frac{17}{2}$ | 4463.0981  | -0.0005          | 0.002             |
| $5_{2,4} \frac{9}{2} - 6_{1,6} \frac{11}{2}$  | 4566.9669  | 0.0026           | 0.002             |
| $5_{2,4} \frac{11}{2} - 6_{1,6} \frac{13}{2}$ | 4584.1485  | -0.0023          | 0.002             |
| $5_{2,4} \frac{7}{2} - 6_{1,6} \frac{9}{2}$   | 4518.9594  | 0.0028           | 0.002             |
| $6_{0,6} \frac{15}{2} - 5_{1,4} \frac{15}{2}$ | 12069.9657 | -0.0026          | 0.006             |
| $6_{0,6} \frac{13}{2} - 5_{1,4} \frac{13}{2}$ | 12291.6112 | 0.0001           | 0.006             |
| $6_{0,6} \frac{11}{2} - 5_{1,4} \frac{9}{2}$  | 12334.5107 | -0.0005          | 0.006             |

*continued*

Supplementary Data Table 1. (continued)

| $J'_{K-1,K+1}F' - J''_{K-1,K+1}F''$         | Observed   | O-C <sup>a</sup> | Unc. <sup>b</sup> |
|---------------------------------------------|------------|------------------|-------------------|
| $6_{0,6}\frac{9}{2} - 5_{1,4}\frac{7}{2}$   | 12339.3404 | -0.0029          | 0.006             |
| $6_{0,6}\frac{13}{2} - 5_{1,4}\frac{11}{2}$ | 12344.5019 | -0.0019          | 0.006             |
| $6_{0,6}\frac{7}{2} - 5_{1,4}\frac{5}{2}$   | 12361.5704 | -0.0025          | 0.006             |
| $6_{0,6}\frac{15}{2} - 5_{1,4}\frac{13}{2}$ | 12363.0998 | -0.0003          | 0.006             |
| $6_{0,6}\frac{17}{2} - 5_{1,4}\frac{15}{2}$ | 12373.9201 | -0.0026          | 0.006             |
| $6_{0,6}\frac{11}{2} - 5_{1,4}\frac{11}{2}$ | 12430.1668 | 0.0033           | 0.006             |
| $6_{0,6}\frac{9}{2} - 5_{1,4}\frac{9}{2}$   | 12513.4187 | -0.0087          | 0.006             |
| $6_{0,6}\frac{7}{2} - 5_{1,4}\frac{7}{2}$   | 12558.1300 | 0.0049           | 0.006             |
| $6_{1,6}\frac{17}{2} - 6_{0,6}\frac{17}{2}$ | 5499.5048  | 0.0023           | 0.002             |
| $6_{3,3}\frac{11}{2} - 8_{1,8}\frac{13}{2}$ | 13062.4955 | 0.0093           | 0.006             |
| $6_{3,3}\frac{7}{2} - 7_{2,5}\frac{9}{2}$   | 12935.4911 | 0.0033           | 0.006             |
| $6_{3,3}\frac{17}{2} - 7_{2,5}\frac{19}{2}$ | 12960.0258 | -0.0054          | 0.006             |
| $6_{3,3}\frac{9}{2} - 7_{2,5}\frac{11}{2}$  | 13068.6591 | -0.0082          | 0.006             |
| $6_{3,3}\frac{15}{2} - 7_{2,5}\frac{17}{2}$ | 13103.1192 | -0.0113          | 0.006             |
| $6_{3,3}\frac{13}{2} - 7_{2,5}\frac{15}{2}$ | 13139.3838 | -0.0046          | 0.006             |
| $6_{3,3}\frac{11}{2} - 7_{2,5}\frac{13}{2}$ | 13161.4003 | -0.0230          | 0.006             |
| $6_{3,4}\frac{7}{2} - 7_{2,6}\frac{9}{2}$   | 13922.6321 | 0.0079           | 0.006             |
| $6_{3,4}\frac{17}{2} - 7_{2,6}\frac{19}{2}$ | 13953.7695 | 0.0000           | 0.006             |
| $6_{3,4}\frac{15}{2} - 7_{2,6}\frac{17}{2}$ | 14084.2836 | 0.0105           | 0.006             |
| $6_{3,4}\frac{11}{2} - 7_{2,6}\frac{13}{2}$ | 14093.2361 | -0.0060          | 0.006             |

*continued*

Supplementary Data Table 1. (continued)

| $J'_{K-1,K+1}F' - J''_{K-1,K+1}F''$           | Observed   | O-C <sup>a</sup> | Unc. <sup>b</sup> |
|-----------------------------------------------|------------|------------------|-------------------|
| $6_{3,4} \frac{13}{2} - 7_{2,6} \frac{15}{2}$ | 14120.8737 | -0.0085          | 0.006             |
| $7_{0,7} \frac{15}{2} - 6_{1,5} \frac{15}{2}$ | 14901.3433 | -0.0014          | 0.006             |
| $7_{0,7} \frac{11}{2} - 6_{1,5} \frac{9}{2}$  | 14961.2579 | -0.0037          | 0.006             |
| $7_{0,7} \frac{13}{2} - 6_{1,5} \frac{11}{2}$ | 14963.8833 | -0.0037          | 0.006             |
| $7_{0,7} \frac{9}{2} - 6_{1,5} \frac{7}{2}$   | 14973.6028 | -0.0038          | 0.006             |
| $7_{0,7} \frac{15}{2} - 6_{1,5} \frac{13}{2}$ | 14973.8178 | -0.0028          | 0.006             |
| $7_{0,7} \frac{17}{2} - 6_{1,5} \frac{15}{2}$ | 14982.0528 | -0.0024          | 0.006             |
| $7_{0,7} \frac{19}{2} - 6_{1,5} \frac{17}{2}$ | 14988.4923 | -0.0019          | 0.006             |
| $7_{0,7} \frac{13}{2} - 6_{1,5} \frac{13}{2}$ | 15047.2707 | 0.0023           | 0.006             |
| $7_{0,7} \frac{11}{2} - 6_{1,5} \frac{11}{2}$ | 15136.7010 | 0.0080           | 0.006             |
| $7_{0,7} \frac{9}{2} - 6_{1,5} \frac{9}{2}$   | 15186.5539 | 0.0030           | 0.006             |
| $7_{1,7} \frac{13}{2} - 7_{0,7} \frac{11}{2}$ | 4647.4465  | -0.0005          | 0.002             |
| $7_{1,7} \frac{15}{2} - 7_{0,7} \frac{17}{2}$ | 4744.8847  | -0.0030          | 0.002             |
| $7_{1,7} \frac{15}{2} - 7_{0,7} \frac{13}{2}$ | 4752.1493  | -0.0012          | 0.002             |
| $7_{1,7} \frac{9}{2} - 7_{0,7} \frac{9}{2}$   | 4791.4336  | 0.0042           | 0.002             |
| $7_{1,7} \frac{19}{2} - 7_{0,7} \frac{19}{2}$ | 4798.8244  | 0.0011           | 0.002             |
| $7_{1,7} \frac{11}{2} - 7_{0,7} \frac{11}{2}$ | 4807.2438  | 0.0015           | 0.002             |
| $7_{1,7} \frac{17}{2} - 7_{0,7} \frac{17}{2}$ | 4818.9572  | -0.0017          | 0.002             |
| $7_{1,7} \frac{13}{2} - 7_{0,7} \frac{13}{2}$ | 4820.2528  | -0.0002          | 0.002             |
| $7_{1,7} \frac{15}{2} - 7_{0,7} \frac{15}{2}$ | 4825.5961  | -0.0021          | 0.002             |
| $7_{1,7} \frac{13}{2} - 7_{0,7} \frac{15}{2}$ | 4893.7013  | 0.0006           | 0.002             |
| $7_{1,7} \frac{17}{2} - 7_{0,7} \frac{15}{2}$ | 4899.6716  | 0.0021           | 0.002             |

*continued*

Supplementary Data Table 1. (continued)

| $J'_{K-1,K+1}F' - J''_{K-1,K+1}F''$           | Observed   | O-C <sup>a</sup> | Unc. <sup>b</sup> |
|-----------------------------------------------|------------|------------------|-------------------|
| $7_{1,7} \frac{11}{2} - 7_{0,7} \frac{13}{2}$ | 4980.0515  | 0.0033           | 0.002             |
| $7_{3,5} \frac{13}{2} - 9_{0,9} \frac{15}{2}$ | 10395.9926 | -0.0098          | 0.006             |
| $7_{3,4} \frac{13}{2} - 8_{2,6} \frac{15}{2}$ | 8763.9193  | -0.0034          | 0.006             |
| $7_{3,4} \frac{11}{2} - 8_{2,6} \frac{13}{2}$ | 8710.1399  | 0.0034           | 0.006             |
| $7_{3,4} \frac{15}{2} - 8_{2,6} \frac{17}{2}$ | 8780.3273  | -0.0031          | 0.006             |
| $7_{3,4} \frac{9}{2} - 8_{2,6} \frac{11}{2}$  | 8627.7564  | 0.0024           | 0.006             |
| $7_{3,4} \frac{19}{2} - 8_{2,6} \frac{21}{2}$ | 8649.0387  | 0.0118           | 0.006             |
| $7_{3,4} \frac{17}{2} - 8_{2,6} \frac{19}{2}$ | 8748.2906  | -0.0014          | 0.006             |
| $7_{3,5} \frac{19}{2} - 8_{2,7} \frac{21}{2}$ | 10246.7691 | -0.0005          | 0.006             |
| $7_{3,5} \frac{17}{2} - 8_{2,7} \frac{19}{2}$ | 10342.8232 | -0.0081          | 0.006             |
| $7_{3,5} \frac{15}{2} - 8_{2,7} \frac{17}{2}$ | 10372.6539 | -0.0066          | 0.006             |
| $7_{3,5} \frac{11}{2} - 8_{2,7} \frac{13}{2}$ | 10325.2692 | -0.0033          | 0.006             |
| $7_{3,5} \frac{9}{2} - 8_{2,7} \frac{11}{2}$  | 10233.1771 | 0.0031           | 0.006             |
| $7_{3,5} \frac{13}{2} - 8_{2,7} \frac{15}{2}$ | 10326.3368 | -0.0142          | 0.006             |
| $8_{1,7} \frac{13}{2} - 8_{1,8} \frac{11}{2}$ | 10405.8738 | 0.0042           | 0.006             |
| $8_{1,7} \frac{17}{2} - 8_{1,8} \frac{15}{2}$ | 10581.4167 | -0.0138          | 0.006             |
| $8_{1,7} \frac{15}{2} - 8_{1,8} \frac{13}{2}$ | 10436.1155 | 0.0110           | 0.006             |
| $8_{1,7} \frac{17}{2} - 7_{2,5} \frac{15}{2}$ | 10479.3122 | 0.0054           | 0.006             |
| $8_{1,7} \frac{13}{2} - 7_{2,5} \frac{11}{2}$ | 10544.7545 | -0.0136          | 0.006             |

*continued*

Supplementary Data Table 1. (continued)

| $J'_{K-1,K+1}F' - J''_{K-1,K+1}F''$               | Observed   | O-C <sup>a</sup> | Unc. <sup>b</sup> |
|---------------------------------------------------|------------|------------------|-------------------|
| $8_{1,7} \frac{21}{2} - 7_{2,5} \frac{19}{2}$     | 10548.3879 | -0.0080          | 0.006             |
| $8_{1,7} \frac{17}{2} - 7_{2,5} \frac{17}{2}$     | 10414.7081 | -0.0092          | 0.006             |
| $8_{1,7} \frac{19}{2} - 7_{2,5} \frac{17}{2}$     | 10503.1692 | -0.0062          | 0.006             |
| $8_{1,7} \frac{15}{2} - 7_{2,5} \frac{13}{2}$     | 10535.0222 | -0.0194          | 0.006             |
| $8_{1,7} \frac{11}{2} - 7_{2,5} \frac{9}{2}$      | 10561.7321 | -0.0078          | 0.006             |
| $8_{1,8} \frac{19}{2} - 8_{0,8} \frac{19}{2}$     | 4109.3901  | -0.0044          | 0.002             |
| $8_{1,8} \frac{17}{2} - 8_{0,8} \frac{17}{2}$     | 4119.9843  | -0.0027          | 0.002             |
| $8_{1,8} \frac{11}{2} - 8_{0,8} \frac{11}{2}$     | 4126.9392  | -0.0046          | 0.002             |
| $9_{1,8} \frac{19}{2} - 8_{2,6} \frac{17}{2}$     | 14911.1199 | 0.0013           | 0.006             |
| $9_{1,8} \frac{17}{2} - 8_{2,6} \frac{15}{2}$     | 14913.9218 | -0.0009          | 0.006             |
| $9_{1,8} \frac{21}{2} - 8_{2,6} \frac{19}{2}$     | 14928.9591 | 0.0018           | 0.006             |
| $9_{1,8} \frac{23}{2} - 8_{2,6} \frac{21}{2}$     | 14967.9541 | -0.0037          | 0.006             |
| $9_{1,8} \frac{15}{2} - 8_{2,6} \frac{13}{2}$     | 14934.0863 | -0.0005          | 0.006             |
| $10_{4,6} \frac{25}{2} - 11_{3,8} \frac{27}{2}$   | 13957.8943 | -0.0003          | 0.006             |
| $11_{2,10} \frac{25}{2} - 11_{1,10} \frac{25}{2}$ | 15491.6128 | -0.0092          | 0.006             |
| $11_{2,10} \frac{27}{2} - 11_{1,10} \frac{27}{2}$ | 15502.3103 | 0.0044           | 0.006             |
| $11_{2,10} \frac{17}{2} - 11_{1,10} \frac{17}{2}$ | 15508.5201 | -0.0005          | 0.006             |
| $11_{2,10} \frac{19}{2} - 11_{1,10} \frac{19}{2}$ | 15529.1013 | -0.0150          | 0.006             |
| $11_{2,10} \frac{21}{2} - 11_{1,10} \frac{21}{2}$ | 15536.0553 | -0.0185          | 0.006             |
| $11_{2,10} \frac{23}{2} - 11_{1,10} \frac{23}{2}$ | 15551.9796 | 0.0105           | 0.006             |

*continued*

Supplementary Data Table 1. (continued)

| $J'_{K-1,K+1} F' - J''_{K-1,K+1} F''$             | Observed   | O-C <sup>a</sup> | Unc. <sup>b</sup> |
|---------------------------------------------------|------------|------------------|-------------------|
| $12_{1,12} \frac{19}{2} - 11_{2,10} \frac{17}{2}$ | 9580.6556  | 0.0054           | 0.006             |
| $12_{1,12} \frac{29}{2} - 11_{2,10} \frac{27}{2}$ | 9594.1474  | -0.0037          | 0.006             |
| $12_{1,12} \frac{23}{2} - 11_{2,10} \frac{21}{2}$ | 9574.7873  | -0.0109          | 0.006             |
| $12_{2,11} \frac{19}{2} - 12_{1,11} \frac{19}{2}$ | 14061.1711 | 0.0144           | 0.006             |
| $12_{2,11} \frac{29}{2} - 12_{1,11} \frac{29}{2}$ | 14063.8503 | 0.0070           | 0.006             |
| $12_{2,11} \frac{21}{2} - 12_{1,11} \frac{21}{2}$ | 14079.9973 | 0.0015           | 0.006             |
| $12_{2,11} \frac{27}{2} - 12_{1,11} \frac{27}{2}$ | 14088.7437 | 0.0107           | 0.006             |
| $12_{2,11} \frac{23}{2} - 12_{1,11} \frac{23}{2}$ | 14092.0844 | -0.0047          | 0.006             |
| $12_{2,11} \frac{25}{2} - 12_{1,11} \frac{25}{2}$ | 14095.9876 | -0.0041          | 0.006             |
| $13_{2,12} \frac{29}{2} - 13_{1,12} \frac{29}{2}$ | 12618.5745 | -0.0008          | 0.006             |
| $13_{2,12} \frac{25}{2} - 13_{1,12} \frac{25}{2}$ | 12622.2486 | -0.0056          | 0.006             |
| $13_{2,12} \frac{21}{2} - 13_{1,12} \frac{21}{2}$ | 12595.2218 | 0.0028           | 0.006             |
| $13_{2,12} \frac{27}{2} - 13_{1,12} \frac{27}{2}$ | 12625.3439 | -0.0054          | 0.006             |
| $13_{2,12} \frac{31}{2} - 13_{1,12} \frac{31}{2}$ | 12597.5818 | -0.0017          | 0.006             |
| $13_{2,12} \frac{23}{2} - 13_{1,12} \frac{23}{2}$ | 12611.7258 | -0.0087          | 0.006             |
| $14_{1,14} \frac{33}{2} - 13_{2,12} \frac{31}{2}$ | 12958.1779 | -0.0060          | 0.006             |
| $14_{2,13} \frac{25}{2} - 14_{1,13} \frac{25}{2}$ | 11145.7931 | 0.0063           | 0.006             |
| $14_{2,13} \frac{31}{2} - 14_{1,13} \frac{31}{2}$ | 11151.2780 | -0.0072          | 0.006             |
| $14_{2,13} \frac{27}{2} - 14_{1,13} \frac{27}{2}$ | 11154.2216 | -0.0044          | 0.006             |
| $14_{2,13} \frac{33}{2} - 14_{1,13} \frac{33}{2}$ | 11132.6440 | 0.0067           | 0.006             |

*continued*

Supplementary Data Table 1. (continued)

| $J'_{K-1,K+1} F' - J''_{K-1,K+1} F''$             | Observed    | O-C <sup>a</sup> | Unc. <sup>b</sup> |
|---------------------------------------------------|-------------|------------------|-------------------|
| $14_{2,13} \frac{29}{2} - 14_{1,13} \frac{29}{2}$ | 11156.8466  | -0.0060          | 0.006             |
| $14_{2,13} \frac{23}{2} - 14_{1,13} \frac{23}{2}$ | 11132.0160  | 0.0155           | 0.006             |
| $15_{2,14} \frac{31}{2} - 15_{1,14} \frac{31}{2}$ | 9720.1444   | -0.0045          | 0.006             |
| $15_{2,14} \frac{25}{2} - 15_{1,14} \frac{25}{2}$ | 9697.6525   | 0.0040           | 0.006             |
| $15_{2,14} \frac{35}{2} - 15_{1,14} \frac{35}{2}$ | 9699.7722   | 0.0042           | 0.006             |
| $15_{2,14} \frac{27}{2} - 15_{1,14} \frac{27}{2}$ | 9710.2961   | 0.0000           | 0.006             |
| $15_{2,14} \frac{33}{2} - 15_{1,14} \frac{33}{2}$ | 9714.4137   | -0.0065          | 0.006             |
| $15_{2,14} \frac{29}{2} - 15_{1,14} \frac{29}{2}$ | 9718.2937   | 0.0024           | 0.006             |
| $16_{2,15} \frac{29}{2} - 16_{1,15} \frac{29}{2}$ | 8338.5685   | -0.0001          | 0.006             |
| $16_{2,15} \frac{35}{2} - 16_{1,15} \frac{35}{2}$ | 8341.9059   | 0.0038           | 0.006             |
| $16_{2,15} \frac{31}{2} - 16_{1,15} \frac{31}{2}$ | 8345.2793   | 0.0003           | 0.006             |
| $16_{2,15} \frac{33}{2} - 16_{1,15} \frac{33}{2}$ | 8346.7937   | 0.0027           | 0.006             |
| $16_{2,15} \frac{27}{2} - 16_{1,15} \frac{27}{2}$ | 8327.7805   | 0.0047           | 0.006             |
| $16_{2,15} \frac{37}{2} - 16_{1,15} \frac{37}{2}$ | 8329.3556   | 0.0028           | 0.006             |
| $16_{16,0} \frac{37}{2} - 15_{15,0} \frac{35}{2}$ | 316091.5366 | -0.0167          | 0.030             |
| $16_{16,0} \frac{35}{2} - 15_{15,0} \frac{33}{2}$ | 316092.9469 | -0.0161          | 0.030             |
| $16_{16,0} \frac{27}{2} - 15_{15,0} \frac{25}{2}$ | 316095.8613 | -0.0244          | 0.030             |
| $16_{16,0} \frac{33}{2} - 15_{15,0} \frac{31}{2}$ | 316096.9404 | -0.0200          | 0.030             |
| $16_{16,0} \frac{31}{2} - 15_{15,0} \frac{29}{2}$ | 316100.5065 | -0.0329          | 0.030             |
| $16_{16,0} \frac{29}{2} - 15_{15,0} \frac{27}{2}$ | 316100.9839 | 0.0085           | 0.030             |

*continued*

Supplementary Data Table 1. (continued)

| $J'_{K-1,K+1} F' - J''_{K-1,K+1} F''$             | Observed    | O-C <sup>a</sup> | Unc. <sup>b</sup> |
|---------------------------------------------------|-------------|------------------|-------------------|
| $19_{19,0} \frac{35}{2} - 19_{18,2} \frac{35}{2}$ | 303061.1103 | 0.0138           | 0.030             |
| $19_{19,0} \frac{41}{2} - 19_{18,2} \frac{41}{2}$ | 303079.1190 | -0.0017          | 0.030             |
| $19_{19,0} \frac{37}{2} - 19_{18,2} \frac{37}{2}$ | 303105.9711 | 0.0703           | 0.030             |
| $19_{19,1} \frac{39}{2} - 19_{18,1} \frac{39}{2}$ | 303113.8924 | 0.0642           | 0.030             |
| $20_{15,5} \frac{35}{2} - 19_{14,5} \frac{33}{2}$ | 315227.6287 | -0.0061          | 0.030             |
| $20_{15,5} \frac{45}{2} - 19_{14,5} \frac{43}{2}$ | 315228.8514 | -0.0062          | 0.030             |
| $20_{15,5} \frac{37}{2} - 19_{14,5} \frac{35}{2}$ | 315243.6115 | 0.0113           | 0.030             |
| $20_{15,5} \frac{43}{2} - 19_{14,5} \frac{41}{2}$ | 315245.4894 | 0.0082           | 0.030             |
| $20_{15,5} \frac{39}{2} - 19_{14,5} \frac{37}{2}$ | 315252.3064 | -0.0124          | 0.030             |
| $20_{15,5} \frac{41}{2} - 19_{14,5} \frac{39}{2}$ | 315253.1295 | -0.0115          | 0.030             |
| $20_{19,2} \frac{35}{2} - 20_{18,2} \frac{35}{2}$ | 302985.5072 | -0.0314          | 0.030             |
| $20_{19,1} \frac{45}{2} - 20_{18,3} \frac{45}{2}$ | 302994.8408 | -0.0212          | 0.030             |
| $20_{19,1} \frac{43}{2} - 20_{18,3} \frac{43}{2}$ | 303069.8753 | -0.0163          | 0.030             |
| $20_{19,2} \frac{39}{2} - 20_{18,2} \frac{39}{2}$ | 303094.6220 | 0.0191           | 0.030             |
| $20_{19,1} \frac{41}{2} - 20_{18,3} \frac{41}{2}$ | 303101.5012 | 0.0194           | 0.030             |
| $21_{19,2} \frac{37}{2} - 21_{18,4} \frac{37}{2}$ | 302984.0757 | -0.0513          | 0.030             |
| $21_{19,2} \frac{47}{2} - 21_{18,4} \frac{47}{2}$ | 302992.0683 | -0.0361          | 0.030             |
| $21_{19,2} \frac{39}{2} - 21_{18,4} \frac{39}{2}$ | 303046.6710 | -0.0307          | 0.030             |
| $24_{19,5} \frac{47}{2} - 24_{18,7} \frac{47}{2}$ | 303046.6710 | 0.0425           | 0.030             |
| $21_{19,2} \frac{45}{2} - 21_{18,4} \frac{45}{2}$ | 303060.2881 | -0.0065          | 0.030             |
| $21_{19,3} \frac{41}{2} - 21_{18,3} \frac{41}{2}$ | 303083.1974 | 0.0275           | 0.030             |

*continued*

Supplementary Data Table 1. (continued)

| $J'_{K-1,K+1} F' - J''_{K-1,K+1} F''$               | Observed    | O-C <sup>a</sup> | Unc. <sup>b</sup> |
|-----------------------------------------------------|-------------|------------------|-------------------|
| $21_{19,2} \frac{43}{2} - 21_{18,4} \frac{43}{2}$   | 303089.2002 | 0.0250           | 0.030             |
| $22_{19,3} \frac{39}{2} - 22_{18,5} \frac{39}{2}$   | 302981.0784 | -0.0198          | 0.030             |
| $22_{19,3} \frac{41}{2} - 22_{18,5} \frac{41}{2}$   | 303038.2923 | -0.0097          | 0.030             |
| $22_{19,3} \frac{43}{2} - 22_{18,5} \frac{43}{2}$   | 303071.4603 | 0.0097           | 0.030             |
| $22_{19,3} \frac{45}{2} - 22_{18,5} \frac{45}{2}$   | 303076.7229 | 0.0003           | 0.030             |
| $23_{19,4} \frac{51}{2} - 23_{18,6} \frac{51}{2}$   | 302982.4741 | -0.0491          | 0.030             |
| $27_{19,8} \frac{51}{2} - 27_{18,10} \frac{51}{2}$  | 302982.4741 | 0.0481           | 0.030             |
| $23_{19,4} \frac{43}{2} - 23_{18,6} \frac{43}{2}$   | 303029.0110 | -0.0365          | 0.030             |
| $23_{19,4} \frac{49}{2} - 23_{18,6} \frac{49}{2}$   | 303039.5590 | 0.0170           | 0.030             |
| $23_{19,5} \frac{45}{2} - 23_{18,5} \frac{45}{2}$   | 303059.3183 | 0.0077           | 0.030             |
| $23_{19,4} \frac{47}{2} - 23_{18,6} \frac{47}{2}$   | 303063.9420 | -0.0208          | 0.030             |
| $24_{19,6} \frac{43}{2} - 24_{18,6} \frac{43}{2}$   | 302970.5216 | -0.0062          | 0.030             |
| $24_{19,5} \frac{53}{2} - 24_{18,7} \frac{53}{2}$   | 302975.7216 | -0.0332          | 0.030             |
| $24_{19,6} \frac{51}{2} - 24_{18,6} \frac{51}{2}$   | 303028.2029 | 0.0211           | 0.030             |
| $25_{14,11} \frac{45}{2} - 24_{13,11} \frac{43}{2}$ | 318231.1432 | 0.0255           | 0.030             |
| $25_{14,11} \frac{55}{2} - 24_{13,11} \frac{53}{2}$ | 318232.9360 | 0.0458           | 0.030             |
| $25_{14,11} \frac{47}{2} - 24_{13,11} \frac{45}{2}$ | 318246.6488 | -0.0026          | 0.030             |
| $25_{14,11} \frac{53}{2} - 24_{13,11} \frac{51}{2}$ | 318249.8469 | 0.0092           | 0.030             |
| $25_{14,11} \frac{49}{2} - 24_{13,11} \frac{47}{2}$ | 318255.6315 | -0.0012          | 0.030             |
| $25_{14,11} \frac{51}{2} - 24_{13,11} \frac{49}{2}$ | 318257.0412 | -0.0081          | 0.030             |

*continued*

Supplementary Data Table 1. (continued)

| $J'_{K-1,K+1} F' - J''_{K-1,K+1} F''$               | Observed    | O-C <sup>a</sup> | Unc. <sup>b</sup> |
|-----------------------------------------------------|-------------|------------------|-------------------|
| $25_{19,6} \frac{45}{2} - 25_{18,8} \frac{45}{2}$   | 302963.0743 | -0.0029          | 0.030             |
| $25_{19,6} \frac{55}{2} - 25_{18,8} \frac{55}{2}$   | 302967.6229 | -0.0520          | 0.030             |
| $25_{19,6} \frac{47}{2} - 25_{18,8} \frac{47}{2}$   | 303007.7868 | 0.0134           | 0.030             |
| $25_{19,6} \frac{53}{2} - 25_{18,8} \frac{53}{2}$   | 303016.0219 | -0.0170          | 0.030             |
| $25_{19,7} \frac{49}{2} - 25_{18,7} \frac{49}{2}$   | 303033.2869 | -0.0046          | 0.030             |
| $25_{19,7} \frac{51}{2} - 25_{18,7} \frac{51}{2}$   | 303036.9777 | 0.0119           | 0.030             |
| $26_{19,7} \frac{47}{2} - 26_{18,9} \frac{47}{2}$   | 302954.2081 | 0.0033           | 0.030             |
| $26_{19,7} \frac{57}{2} - 26_{18,9} \frac{57}{2}$   | 302958.2611 | -0.0097          | 0.030             |
| $26_{19,7} \frac{49}{2} - 26_{18,9} \frac{49}{2}$   | 302995.6312 | -0.0087          | 0.030             |
| $26_{19,7} \frac{55}{2} - 26_{18,9} \frac{55}{2}$   | 303003.0187 | -0.0050          | 0.030             |
| $26_{19,7} \frac{53}{2} - 26_{18,9} \frac{53}{2}$   | 303022.4591 | -0.0208          | 0.030             |
| $27_{19,8} \frac{49}{2} - 27_{18,10} \frac{49}{2}$  | 302943.9201 | 0.0151           | 0.030             |
| $29_{19,10} \frac{61}{2} - 29_{18,12} \frac{59}{2}$ | 302943.9201 | 0.0516           | 0.030             |
| $27_{19,8} \frac{59}{2} - 27_{18,10} \frac{59}{2}$  | 302947.5464 | 0.0277           | 0.030             |
| $27_{19,8} \frac{57}{2} - 27_{18,10} \frac{57}{2}$  | 302989.0430 | -0.0052          | 0.030             |
| $27_{19,8} \frac{53}{2} - 27_{18,10} \frac{53}{2}$  | 303004.2356 | 0.0012           | 0.030             |
| $27_{19,8} \frac{55}{2} - 27_{18,10} \frac{55}{2}$  | 303007.1738 | -0.0106          | 0.030             |
| $28_{19,9} \frac{51}{2} - 28_{18,11} \frac{51}{2}$  | 302932.1758 | 0.0170           | 0.030             |
| $28_{19,9} \frac{53}{2} - 28_{18,11} \frac{53}{2}$  | 302968.0697 | 0.0053           | 0.030             |
| $28_{19,10} \frac{55}{2} - 28_{18,10} \frac{55}{2}$ | 302988.3014 | -0.0129          | 0.030             |

*continued*

Supplementary Data Table 1. (continued)

| $J'_{K-1,K+1} F' - J''_{K-1,K+1} F''$               | Observed    | O-C <sup>a</sup> | Unc. <sup>b</sup> |
|-----------------------------------------------------|-------------|------------------|-------------------|
| $28_{19,10} \frac{57}{2} - 28_{18,10} \frac{57}{2}$ | 302990.9861 | 0.0136           | 0.030             |
| $29_{19,10} \frac{53}{2} - 29_{18,12} \frac{53}{2}$ | 302918.9174 | -0.0179          | 0.030             |
| $29_{19,10} \frac{63}{2} - 29_{18,12} \frac{63}{2}$ | 302921.7919 | -0.0353          | 0.030             |
| $31_{19,12} \frac{65}{2} - 31_{18,14} \frac{65}{2}$ | 302921.7919 | -0.0175          | 0.030             |
| $29_{19,10} \frac{55}{2} - 29_{18,12} \frac{55}{2}$ | 302952.4865 | 0.0015           | 0.030             |
| $29_{19,10} \frac{61}{2} - 29_{18,12} \frac{61}{2}$ | 302957.8531 | -0.0166          | 0.030             |
| $29_{19,10} \frac{57}{2} - 29_{18,12} \frac{57}{2}$ | 302971.3590 | 0.0211           | 0.030             |
| $29_{19,10} \frac{59}{2} - 29_{18,12} \frac{57}{2}$ | 302976.5681 | 0.0403           | 0.030             |
| $30_{19,12} \frac{55}{2} - 30_{18,12} \frac{55}{2}$ | 302904.2055 | 0.0105           | 0.030             |
| $30_{19,11} \frac{65}{2} - 30_{18,13} \frac{65}{2}$ | 302906.8139 | 0.0170           | 0.030             |
| $30_{19,11} \frac{63}{2} - 30_{18,13} \frac{63}{2}$ | 302940.5039 | 0.0104           | 0.030             |
| $30_{19,11} \frac{59}{2} - 30_{18,13} \frac{59}{2}$ | 302953.2102 | 0.0004           | 0.030             |
| $30_{19,11} \frac{61}{2} - 30_{18,13} \frac{61}{2}$ | 302955.3747 | -0.0142          | 0.030             |
| $31_{19,12} \frac{57}{2} - 31_{18,14} \frac{57}{2}$ | 302887.9266 | 0.0377           | 0.030             |
| $31_{19,12} \frac{67}{2} - 31_{18,14} \frac{67}{2}$ | 302890.2387 | 0.0010           | 0.030             |
| $31_{19,12} \frac{59}{2} - 31_{18,14} \frac{59}{2}$ | 302917.3731 | -0.0031          | 0.030             |
| $31_{19,12} \frac{61}{2} - 31_{18,14} \frac{61}{2}$ | 302933.8212 | -0.0143          | 0.030             |
| $32_{19,13} \frac{59}{2} - 32_{18,15} \frac{59}{2}$ | 302869.9482 | -0.0133          | 0.030             |
| $32_{19,13} \frac{69}{2} - 32_{18,15} \frac{69}{2}$ | 302872.0924 | 0.0047           | 0.030             |
| $32_{19,13} \frac{61}{2} - 32_{18,15} \frac{61}{2}$ | 302897.7153 | 0.0242           | 0.030             |

*continued*

Supplementary Data Table 1. (continued)

| $J'_{K-1,K+1} F' - J''_{K-1,K+1} F''$               | Observed    | O-C <sup>a</sup> | Unc. <sup>b</sup> |
|-----------------------------------------------------|-------------|------------------|-------------------|
| $32_{19,13} \frac{67}{2} - 32_{18,15} \frac{67}{2}$ | 302901.7554 | 0.0268           | 0.030             |
| $32_{19,13} \frac{63}{2} - 32_{18,15} \frac{63}{2}$ | 302913.1030 | -0.0169          | 0.030             |
| $32_{19,13} \frac{65}{2} - 32_{18,15} \frac{65}{2}$ | 302914.9169 | -0.0088          | 0.030             |
| $33_{12,21} \frac{61}{2} - 32_{11,21} \frac{59}{2}$ | 316313.2979 | 0.0095           | 0.030             |
| $33_{12,21} \frac{71}{2} - 32_{11,21} \frac{69}{2}$ | 316314.5288 | 0.0102           | 0.030             |
| $33_{12,21} \frac{63}{2} - 32_{11,21} \frac{61}{2}$ | 316324.0634 | -0.0010          | 0.030             |
| $33_{12,21} \frac{69}{2} - 32_{11,21} \frac{67}{2}$ | 316326.4338 | -0.0019          | 0.030             |
| $33_{12,21} \frac{65}{2} - 32_{11,21} \frac{63}{2}$ | 316330.3525 | -0.0233          | 0.030             |
| $33_{12,21} \frac{67}{2} - 32_{11,21} \frac{65}{2}$ | 316331.4168 | -0.0218          | 0.030             |
| $33_{19,14} \frac{61}{2} - 33_{18,16} \frac{61}{2}$ | 302850.3838 | 0.0324           | 0.030             |
| $33_{19,14} \frac{71}{2} - 33_{18,16} \frac{71}{2}$ | 302852.3053 | 0.0265           | 0.030             |
| $33_{19,15} \frac{63}{2} - 33_{18,15} \frac{63}{2}$ | 302876.4404 | -0.0363          | 0.030             |
| $33_{19,14} \frac{69}{2} - 33_{18,16} \frac{69}{2}$ | 302880.1473 | -0.0110          | 0.030             |
| $33_{19,14} \frac{67}{2} - 33_{18,16} \frac{65}{2}$ | 302890.9755 | 0.0327           | 0.030             |
| $33_{19,14} \frac{67}{2} - 33_{18,16} \frac{67}{2}$ | 302892.6125 | -0.0019          | 0.030             |
| $34_{19,16} \frac{63}{2} - 34_{18,16} \frac{63}{2}$ | 302829.0587 | 0.0679           | 0.030             |
| $35_{19,16} \frac{67}{2} - 35_{18,18} \frac{67}{2}$ | 302829.0587 | -0.0599          | 0.030             |
| $34_{19,15} \frac{73}{2} - 34_{18,17} \frac{73}{2}$ | 302830.7425 | 0.0097           | 0.030             |
| $34_{19,15} \frac{65}{2} - 34_{18,17} \frac{65}{2}$ | 302853.6625 | 0.0141           | 0.030             |
| $34_{19,15} \frac{71}{2} - 34_{18,17} \frac{71}{2}$ | 302857.0116 | 0.0151           | 0.030             |
| $34_{19,15} \frac{67}{2} - 34_{18,17} \frac{67}{2}$ | 302867.2759 | 0.0018           | 0.030             |

*continued*

Supplementary Data Table 1. (continued)

| $J'_{K-1,K+1} F' - J''_{K-1,K+1} F''$               | Observed    | O-C <sup>a</sup> | Unc. <sup>b</sup> |
|-----------------------------------------------------|-------------|------------------|-------------------|
| $34_{19,15} \frac{69}{2} - 34_{18,17} \frac{69}{2}$ | 302868.7467 | -0.0267          | 0.030             |
| $35_{19,16} \frac{65}{2} - 35_{18,18} \frac{65}{2}$ | 302805.8575 | 0.0504           | 0.030             |
| $36_{19,17} \frac{75}{2} - 36_{18,19} \frac{75}{2}$ | 302805.8575 | -0.0260          | 0.030             |
| $35_{19,16} \frac{75}{2} - 35_{18,18} \frac{75}{2}$ | 302807.3136 | 0.0218           | 0.030             |
| $35_{19,16} \frac{73}{2} - 35_{18,18} \frac{73}{2}$ | 302832.0118 | 0.0075           | 0.030             |
| $35_{19,16} \frac{71}{2} - 35_{18,18} \frac{71}{2}$ | 302843.1409 | -0.0173          | 0.030             |
| $36_{19,17} \frac{69}{2} - 36_{18,19} \frac{69}{2}$ | 302802.7953 | -0.0022          | 0.030             |
| $36_{19,17} \frac{71}{2} - 36_{18,19} \frac{71}{2}$ | 302815.0416 | -0.0199          | 0.030             |
| $36_{19,17} \frac{73}{2} - 36_{18,19} \frac{73}{2}$ | 302816.3970 | -0.0484          | 0.030             |
| $37_{19,19} \frac{79}{2} - 37_{18,19} \frac{77}{2}$ | 302841.8532 | 0.0121           | 0.030             |
| $37_{11,26} \frac{69}{2} - 36_{10,26} \frac{67}{2}$ | 315102.6925 | 0.0058           | 0.030             |
| $37_{11,27} \frac{69}{2} - 36_{10,27} \frac{67}{2}$ | 315102.6925 | -0.0161          | 0.030             |
| $37_{11,26} \frac{79}{2} - 36_{10,26} \frac{77}{2}$ | 315103.4358 | 0.0125           | 0.030             |
| $37_{11,27} \frac{79}{2} - 36_{10,27} \frac{77}{2}$ | 315103.4358 | -0.0100          | 0.030             |
| $37_{11,26} \frac{71}{2} - 36_{10,26} \frac{69}{2}$ | 315111.1249 | -0.0015          | 0.030             |
| $37_{11,27} \frac{71}{2} - 36_{10,27} \frac{69}{2}$ | 315111.1249 | -0.0234          | 0.030             |
| $37_{11,26} \frac{77}{2} - 36_{10,26} \frac{75}{2}$ | 315113.2726 | 0.0057           | 0.030             |
| $37_{11,27} \frac{77}{2} - 36_{10,27} \frac{75}{2}$ | 315113.2726 | -0.0171          | 0.030             |
| $37_{11,26} \frac{73}{2} - 36_{10,26} \frac{71}{2}$ | 315116.4127 | 0.0464           | 0.030             |
| $37_{11,27} \frac{73}{2} - 36_{10,27} \frac{71}{2}$ | 315116.4127 | 0.0243           | 0.030             |

*continued*

Supplementary Data Table 1. (continued)

| $J'_{K-1,K+1} F' - J''_{K-1,K+1} F''$               | Observed    | O-C <sup>a</sup> | Unc. <sup>b</sup> |
|-----------------------------------------------------|-------------|------------------|-------------------|
| $37_{11,26} \frac{75}{2} - 36_{10,26} \frac{73}{2}$ | 315117.3860 | 0.0166           | 0.030             |
| $37_{11,27} \frac{75}{2} - 36_{10,27} \frac{73}{2}$ | 315117.3860 | -0.0059          | 0.030             |
| $42_{10,32} \frac{79}{2} - 41_{9,32} \frac{77}{2}$  | 317132.3127 | 0.0546           | 0.030             |
| $42_{10,32} \frac{89}{2} - 41_{9,32} \frac{87}{2}$  | 317134.3370 | 0.0374           | 0.030             |
| $42_{10,33} \frac{79}{2} - 41_{9,33} \frac{77}{2}$  | 317138.3813 | 0.0418           | 0.030             |
| $42_{10,32} \frac{81}{2} - 41_{9,32} \frac{79}{2}$  | 317139.7555 | -0.0136          | 0.030             |
| $42_{10,33} \frac{89}{2} - 41_{9,33} \frac{87}{2}$  | 317140.4585 | 0.0766           | 0.030             |
| $42_{10,32} \frac{87}{2} - 41_{9,32} \frac{85}{2}$  | 317140.4585 | -0.0546          | 0.030             |
| $42_{10,32} \frac{83}{2} - 41_{9,32} \frac{81}{2}$  | 317144.5514 | 0.0715           | 0.030             |
| $42_{10,32} \frac{85}{2} - 41_{9,32} \frac{83}{2}$  | 317144.5514 | -0.1438          | 0.030             |
| $42_{10,33} \frac{81}{2} - 41_{9,33} \frac{79}{2}$  | 317145.8073 | -0.0367          | 0.030             |
| $42_{10,33} \frac{83}{2} - 41_{9,33} \frac{81}{2}$  | 317150.6164 | 0.0629           | 0.030             |
| $42_{10,33} \frac{85}{2} - 41_{9,33} \frac{83}{2}$  | 317150.6164 | -0.1534          | 0.030             |
| $50_{8,42} \frac{95}{2} - 49_{7,42} \frac{93}{2}$   | 303041.9389 | 0.0213           | 0.030             |
| $50_{8,42} \frac{105}{2} - 49_{7,42} \frac{103}{2}$ | 303042.5752 | 0.0241           | 0.030             |
| $50_{8,42} \frac{97}{2} - 49_{7,42} \frac{95}{2}$   | 303049.3473 | -0.0124          | 0.030             |
| $50_{8,42} \frac{103}{2} - 49_{7,42} \frac{101}{2}$ | 303050.6212 | 0.0392           | 0.030             |
| $50_{8,42} \frac{99}{2} - 49_{7,42} \frac{97}{2}$   | 303053.4676 | -0.0686          | 0.030             |
| $50_{8,42} \frac{101}{2} - 49_{7,42} \frac{99}{2}$  | 303054.0556 | -0.0275          | 0.030             |
| $54_{5,49} \frac{107}{2} - 53_{4,49} \frac{105}{2}$ | 316988.5061 | 0.0175           | 0.030             |
| $54_{5,49} \frac{109}{2} - 53_{4,49} \frac{107}{2}$ | 316988.5061 | 0.0181           | 0.030             |

*continued*

Supplementary Data Table 1. (continued)

| $J'_{K-1,K+1} F' - J''_{K-1,K+1} F''$                 | Observed    | O-C <sup>a</sup> | Unc. <sup>b</sup> |
|-------------------------------------------------------|-------------|------------------|-------------------|
| $54_{5,49} \frac{105}{2} - 53_{4,49} \frac{103}{2}$   | 316990.9850 | 0.0119           | 0.030             |
| $54_{5,49} \frac{111}{2} - 53_{4,49} \frac{109}{2}$   | 316990.9850 | -0.0050          | 0.030             |
| $54_{5,49} \frac{103}{2} - 53_{4,49} \frac{101}{2}$   | 316995.9134 | 0.0230           | 0.030             |
| $54_{5,49} \frac{113}{2} - 53_{4,49} \frac{111}{2}$   | 316995.9134 | -0.0624          | 0.030             |
| $56_{20,37} \frac{109}{2} - 56_{19,37} \frac{109}{2}$ | 318242.4420 | -0.0124          | 0.030             |
| $56_{20,36} \frac{115}{2} - 56_{19,38} \frac{115}{2}$ | 318243.2819 | -0.0076          | 0.030             |
| $56_{20,36} \frac{111}{2} - 56_{19,38} \frac{111}{2}$ | 318247.7327 | 0.0063           | 0.030             |
| $56_{20,36} \frac{113}{2} - 56_{19,38} \frac{113}{2}$ | 318248.0771 | -0.0274          | 0.030             |
| $58_{8,50} \frac{111}{2} - 57_{7,50} \frac{109}{2}$   | 316423.1552 | 0.0488           | 0.030             |
| $58_{8,50} \frac{113}{2} - 57_{7,50} \frac{111}{2}$   | 316428.8187 | 0.0053           | 0.030             |
| $58_{8,50} \frac{119}{2} - 57_{7,50} \frac{117}{2}$   | 316429.6427 | 0.0127           | 0.030             |
| $58_{8,50} \frac{115}{2} - 57_{7,50} \frac{113}{2}$   | 316431.9703 | -0.0123          | 0.030             |
| $58_{8,50} \frac{117}{2} - 57_{7,50} \frac{115}{2}$   | 316432.2958 | -0.0428          | 0.030             |
| $60_{20,41} \frac{125}{2} - 60_{19,41} \frac{125}{2}$ | 317896.2745 | 0.0163           | 0.030             |
| $60_{20,40} \frac{117}{2} - 60_{19,42} \frac{117}{2}$ | 317904.5764 | -0.0132          | 0.030             |
| $60_{20,40} \frac{123}{2} - 60_{19,42} \frac{123}{2}$ | 317905.2673 | -0.0112          | 0.030             |
| $60_{20,40} \frac{119}{2} - 60_{19,42} \frac{119}{2}$ | 317909.1938 | 0.0027           | 0.030             |
| $67_{20,47} \frac{129}{2} - 67_{19,49} \frac{129}{2}$ | 317135.7045 | 0.1505           | 0.030             |
| $67_{20,47} \frac{139}{2} - 67_{19,49} \frac{139}{2}$ | 317135.7045 | -0.0273          | 0.030             |
| $67_{20,47} \frac{131}{2} - 67_{19,49} \frac{131}{2}$ | 317142.4899 | -0.0311          | 0.030             |

*continued*

Supplementary Data Table 1. (continued)

| $J'_{K-1,K+1}F' - J''_{K-1,K+1}F''$                   | Observed    | O-C <sup>a</sup> | Unc. <sup>b</sup> |
|-------------------------------------------------------|-------------|------------------|-------------------|
| $67_{20,47} \frac{137}{2} - 67_{19,49} \frac{137}{2}$ | 317143.0439 | -0.0028          | 0.030             |

<sup>a</sup>Observed - calculated.

<sup>b</sup>2 kHz uncertainties are attributed to the cavity FTMW measurements, 6 kHz to the chirped pulse FTMW transitions, and 30 kHz to the broadband millimeter-wave measurements.
